# Supplementary material for: High Dose Local Photon Irradiation Is Crucial in Anti-CTLA-4 Antibody Therapy to Enhance the Abscopal Response in a Murine Pancreatic Carcinoma Model
Source: MDPI journal article supplement (doi:10.3390/cancers14092087), 2022-04-22
Supplement: s1 [file s1]

## Supplemental Methods S1.

### 1. Derivation of the biological equivalent dose of 16 Gy in a single fraction

The concept of biologically effective dose (BED) with the LQ model is a well-established method in the field of radiation oncology and biology (Hall EJ. Radiobiology for the Radiologist, 4th ed.; J.B. Lippincott Company: Philadelphia, USA, 1993; pp. 211-229).

The biological equivalent dose can be calculated as follows:

$$BED = nd \left[ 1 + \frac{d}{\alpha/\beta} \right]$$

where n and d represent the number of fractions and the dose per fraction, respectively. In cancer cells,  $\alpha/\beta$  is assumed as 10. The BED of 16 Gy in a single fraction is then calculated as follows:

$$BED = nd \left[ 1 + \frac{d}{\alpha/\beta} \right] = 1 \cdot 16 \left[ 1 + \frac{16}{10} \right] = 41.6 \text{ Gy}$$

If we deliver a certain dose in 3 fractions that is equivalent to 16 Gy in a single fraction, the following formula is obtained:

$$BED = 3d \left[ 1 + \frac{d}{10} \right] = 1 \cdot 16 \left[ 1 + \frac{16}{10} \right] = 41.6 \text{ Gy}$$

Then  $d = 8$  is obtained.

This provides that 16 Gy in a single fraction is biologically equal to 8 Gy by 3 fractions.
