# Supplementary material for: High Dose Local Photon Irradiation Is Crucial in Anti-CTLA-4 Antibody Therapy to Enhance the Abscopal Response in a Murine Pancreatic Carcinoma Model
Source: MDPI journal article supplement (doi:10.3390/cancers14092087), 2022-04-22
Supplement: s1 [file s1]

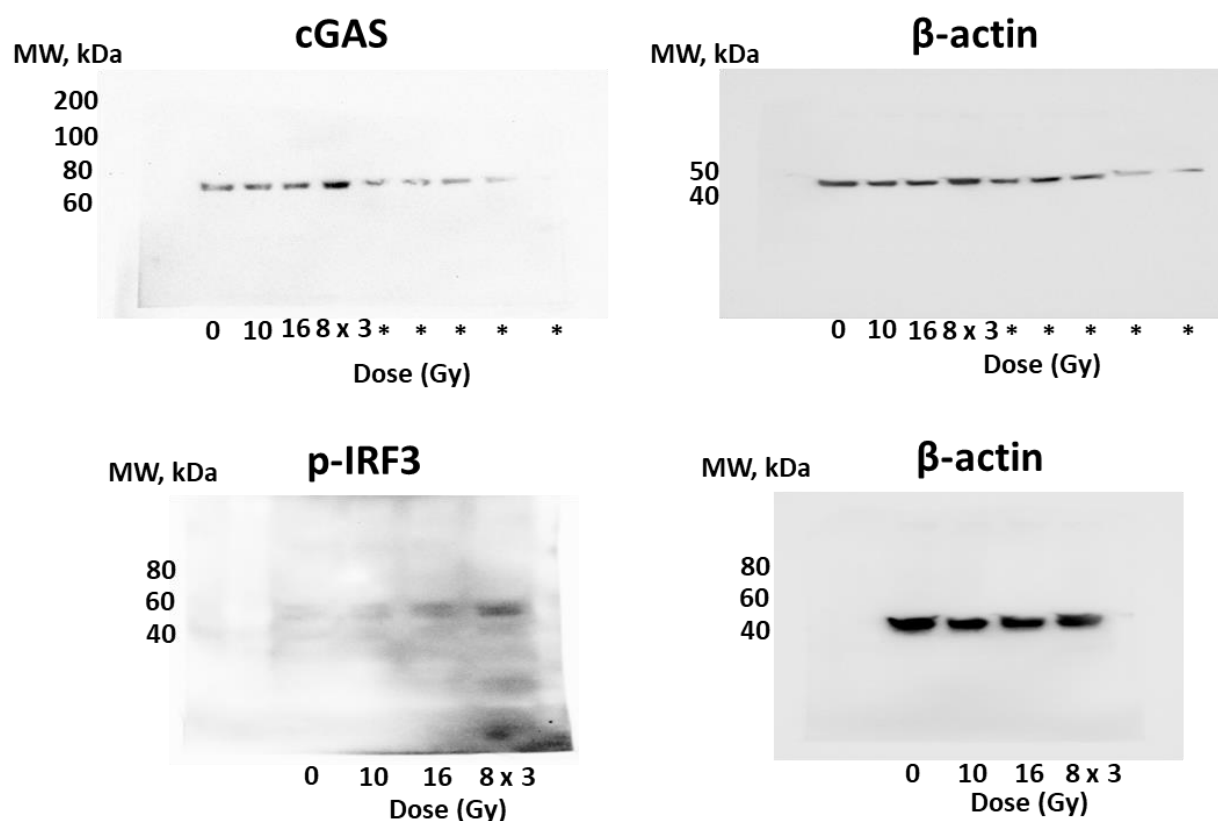

**Figure S1.** Untrimmed data of western blotting in Figure 3 (b). \*: Unrelated samples to this study. Abbreviations; 8 x 3: Irradiation at 8 Gy by three fractions.

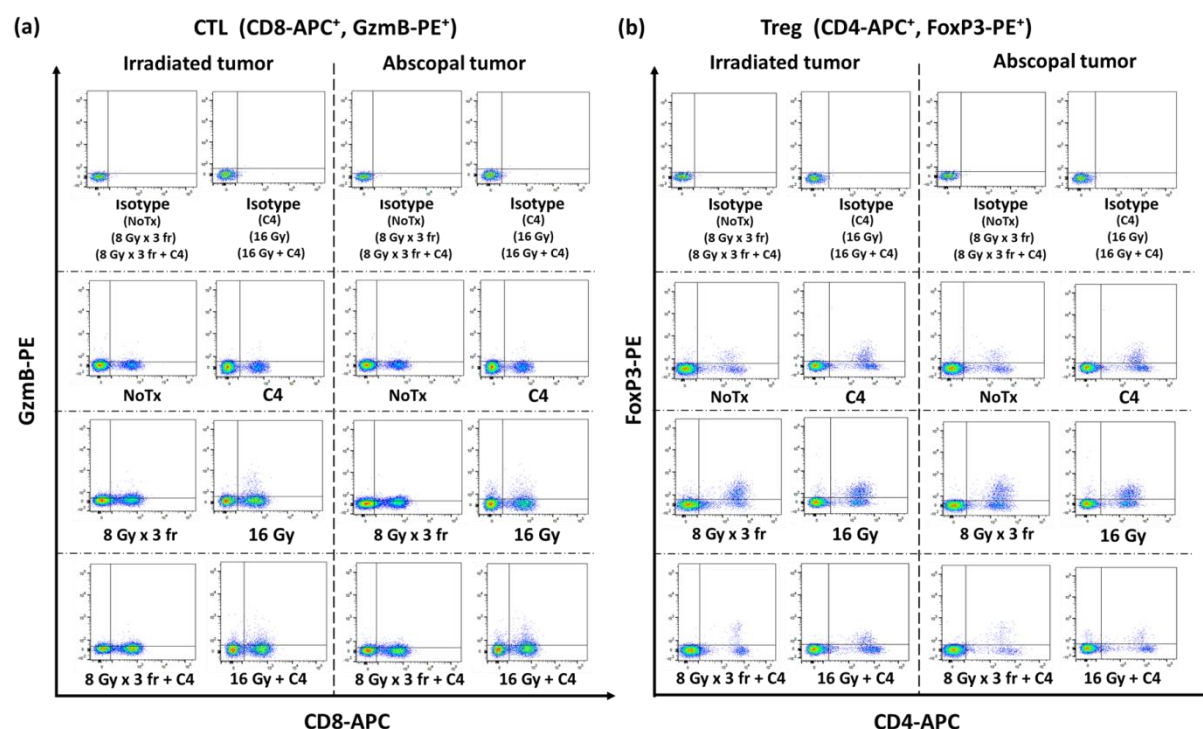

**Figure S2.** Representative dot plots in flow cytometry analyzing (a) cytotoxic T cells (CD45<sup>+</sup>, CD8<sup>+</sup>, and GzmB<sup>+</sup>), and (b) regulatory T cells (CD45<sup>+</sup>, CD4<sup>+</sup>, and FoxP3<sup>+</sup>).

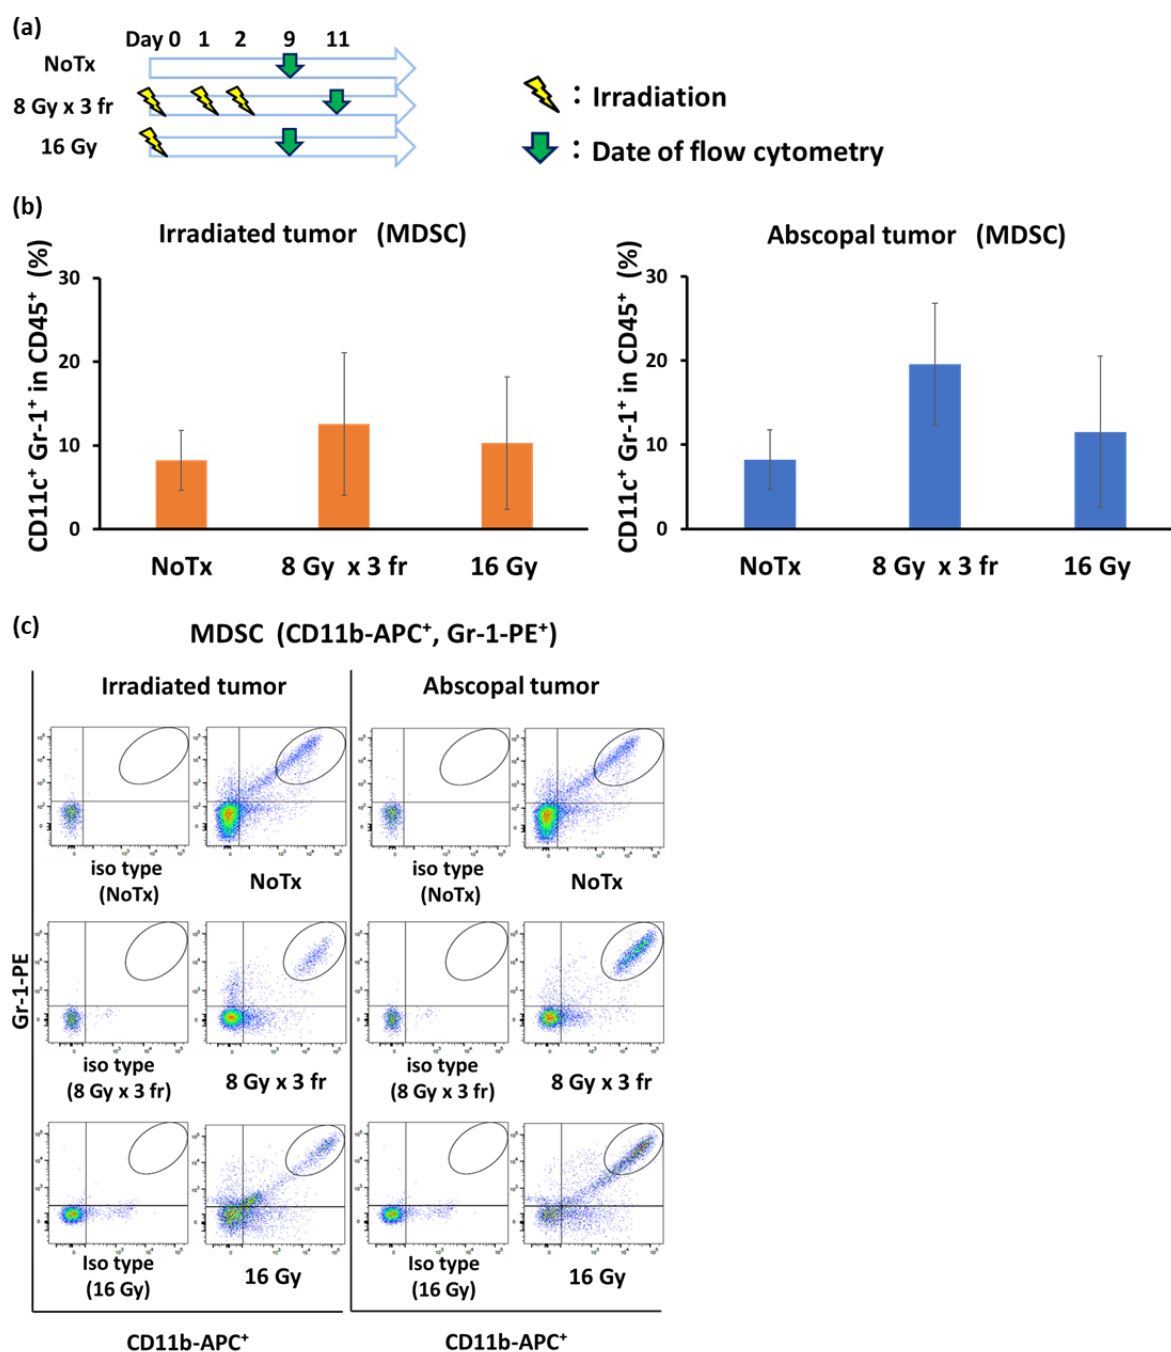

**Figure S3.** The proportion of MDSC in each group. (a) Schedule of the experiment. Treatments were initiated when the longest diameter of the tumor exceeded 8 mm (Day 0). (b) The proportion of MDSC in each group in irradiated and abscopal tumors. Error bars represent SE. Tukey-kramer HSD test was performed to compare the differences in the proportion of MDSC between NoTx, 8 Gy x 3 fr, and 16 Gy). (c) Representative dot plots of MDSC analysis. MDSC is defined as CD11b<sup>high</sup> Gr-1<sup>+</sup> cells. Abbreviations; C4: anti-CTLA-4 antibody, MDSC: Myeloid derived suppressor cells, fr: fraction.
